# Supplementary material for: Determinants of Off-Farm Income among Smallholder Rice Farmers in Northern Ghana: Application of a Double-Hurdle Model
Source: Hindawi journal article supplement (doi:10.1155/2019/7246176), 2019-01-13
Supplement: f1 [file 7246176.f1.xlsx]

## Sheet: Sheet1
code	region	pdnsys	mktdist	sex	age	hhsize	ext	educ	edu	nfminc	amtnfy	catt13	age2	landha
1	0	0	13	1	43	9	0	10	1	1	6000	0	1849	2.0234
2	0	0	13	0	45	4	0	0	0	0	0	0	2025	2.0234
3	0	0	13	1	32	4	0	9	1	0	0	0	1024	1.21404
4	0	0	13	0	46	7	1	0	0	0	0	0	2116	2.0234
5	0	0	13	0	40	8	1	0	0	0	0	0	1600	1.21404
6	0	0	13	0	57	7	0	0	0	0	0	0	3249	1.21404
7	0	0	13	0	55	5	0	0	0	0	0	0	3025	0.40468
8	0	0	13	1	29	4	1	9	1	1	240	0	841	1.0117
9	0	0	13	1	30	5	1	9	1	0	0	0	900	2.83276
10	0	0	13	1	55	3	0	0	0	0	0	0	3025	1.82106
11	0	0	2	1	45	8	0	6	1	1	2400	0	2025	1.61872
12	0	0	2	1	68	4	1	0	0	1	400	0	4624	1.21404
13	0	0	2	0	52	5	1	0	0	1	600	0	2704	0.80936
14	0	0	2	1	30	5	1	16	1	1	6000	0	900	1.41638
15	0	0	2	0	63	7	0	0	0	1	1200	0	3969	0.40468
16	0	0	2	1	62	8	1	10	1	1	480	0	3844	0.80936
17	0	0	2	1	64	10	0	10	1	1	1000	0	4096	3.64212
18	0	0	2	1	36	3	1	9	1	1	1200	0	1296	1.21404
19	0	0	2	1	48	10	1	12	1	0	0	0	2304	3.54095
20	0	0	2	1	32	8	1	10	1	1	1200	1	1024	3.64212
21	0	0	2	1	33	1	1	9	1	0	0	0	1089	1.0117
22	0	0	2	1	37	12	1	13	1	1	4800	1	1369	1.0117
23	0	0	2	1	75	7	1	0	0	0	0	1	5625	1.61872
24	0	0	2	1	68	6	1	0	0	0	0	0	4624	1.0117
25	0	0	2	1	65	6	1	0	0	0	0	1	4225	2.42808
26	0	0	2	1	52	5	0	13	1	1	4800	0	2704	2.63042
27	0	0	2	1	42	6	1	10	1	1	500	0	1764	0.60702
28	0	0	2.5	1	64	6	0	13	1	0	0	0	4096	1.82106
29	0	0	2	1	54	9	1	10	1	1	6000	0	2916	3.43978
30	0	0	2	1	56	8	0	12	1	1	6000	1	3136	4.0468
31	0	0	10	1	39	9	0	0	0	1	200	0	1521	0.80936
32	0	0	10	1	39	3	0	0	0	1	200	0	1521	0.60702
33	0	0	10	1	41	8	0	0	0	0	0	0	1681	0.80936
34	0	0	10	1	49	9	1	6	1	1	340	1	2401	1.21404
35	0	0	10	0	44	3	0	0	0	1	160	0	1936	0.80936
36	0	0	10	1	64	6	0	10	1	0	0	1	4096	1.41638
37	0	0	10	1	54	7	1	10	1	1	600	1	2916	1.0117
38	0	0	10	1	50	5	0	0	0	1	200	0	2500	0.80936
39	0	0	10	0	34	6	0	0	0	1	250	0	1156	0.30351
40	0	0	10	1	64	5	0	0	0	0	0	0	4096	0.60702
41	0	0	12	0	33	6	1	0	0	1	1200	1	1089	0.40468
42	0	0	12	0	40	7	1	0	0	1	1200	0	1600	1.0117
43	0	0	12	0	42	5	1	0	0	1	1200	0	1764	1.61872
44	0	0	12	1	64	3	1	15	1	0	0	1	4096	0.80936
45	0	0	12	1	45	6	1	0	0	0	0	1	2025	1.61872
46	0	0	12	1	40	5	1	0	0	0	0	0	1600	2.22574
47	0	0	12	1	34	4	1	0	0	0	0	0	1156	1.61872
48	0	0	12	1	22	2	0	6	1	1	1200	0	484	1.0117
49	0	0	12	1	37	7	1	0	0	0	0	0	1369	0.80936
50	0	0	12	0	43	8	0	6	1	0	0	0	1849	0.40468
51	0	0	12	0	28	7	1	9	1	1	472	0	784	2.0234
52	0	0	15	0	40	15	1	0	0	0	0	0	1600	4.0468
53	0	0	15	1	32	8	1	5	1	0	0	1	1024	2.42808
54	0	0	15	0	45	7	1	0	0	0	0	1	2025	3.64212
55	0	0	15	0	50	10	1	0	0	1	472	1	2500	1.61872
56	0	0	12	0	60	11	1	0	0	0	0	0	3600	1.82106
57	0	0	12	0	27	9	1	0	0	0	0	1	729	2.0234
58	0	0	12	1	28	6	1	16	1	1	1200	0	784	1.82106
59	0	0	12	1	19	5	0	11	1	0	0	0	361	1.61872
60	0	0	12	1	30	10	1	2	1	0	0	1	900	3.64212
61	0	0	12	0	50	7	1	0	0	1	200	1	2500	5.66552
62	0	0	12	0	35	15	1	0	0	1	100	1	1225	3.43978
63	0	0	12	0	24	9	0	9	1	0	0	1	576	1.61872
64	0	0	12	1	23	7	0	4	1	0	0	0	529	1.61872
65	0	0	15	1	28	6	0	14	1	0	0	0	784	4.0468
66	0	0	12	0	22	7	0	9	1	0	0	1	484	1.0117
67	0	0	12	0	45	5	1	0	0	0	0	0	2025	2.0234
68	0	0	12	0	37	7	1	0	0	1	100	0	1369	2.0234
69	0	0	12	0	32	6	1	4	1	1	300	0	1024	1.92223
70	0	0	12	1	40	5	1	6	1	0	0	0	1600	3.0351
71	0	0	15	0	34	8	1	0	0	1	2400	1	1156	2.83276
72	0	0	5	1	36	6	0	0	0	0	0	1	1296	2.83276
73	0	0	12	0	40	7	0	0	0	1	560	0	1600	1.21404
74	0	0	12	0	27	6	1	0	0	1	472	0	729	1.82106
75	0	0	15	1	44	6	0	0	0	0	0	0	1936	3.23744
76	0	0	15	1	25	3	1	0	0	1	600	1	625	2.0234
77	0	0	15	0	30	12	1	0	0	0	0	1	900	3.84446
78	0	0	12	1	25	4	0	3	1	0	0	1	625	1.41638
79	0	0	12	1	42	10	1	0	0	0	0	0	1764	2.0234
80	0	0	12	1	41	9	1	15	1	1	472	0	1681	2.83276
81	0	0	12	1	27	4	0	3	1	0	0	0	729	2.0234
82	0	0	12	1	26	11	0	6	1	0	0	1	676	0.80936
83	0	0	12	1	35	11	1	12	1	0	0	0	1225	0.80936
84	0	0	10	0	40	9	1	0	0	1	180	1	1600	1.0117
85	0	0	10	1	48	23	1	10	1	1	6300	0	2304	2.22574
86	0	0	9	0	25	7	0	12	1	1	720	0	625	1.21404
87	0	0	9	0	32	11	1	0	0	1	600	0	1024	1.21404
88	0	0	9	1	19	5	1	10	1	1	2500	1	361	3.43978
89	0	0	5	0	55	8	1	0	0	1	300	1	3025	1.21404
90	0	0	12	1	30	11	1	4	1	1	500	1	900	8.90296
91	0	0	6	1	42	10	0	0	0	1	400	0	1764	2.22574
92	0	0	9	1	23	13	1	12	1	0	0	0	529	1.61872
93	0	0	9	1	36	7	1	6	1	0	0	0	1296	1.0117
94	0	0	9	1	39	12	1	20	1	1	6000	0	1521	0.80936
95	0	0	9	1	28	8	0	0	0	1	300	1	784	2.22574
96	0	0	9	1	45	10	1	0	0	0	0	1	2025	2.0234
97	0	0	9	1	42	9	1	0	0	0	0	0	1764	1.82106
98	0	0	9	1	45	11	1	0	0	0	0	1	2025	1.61872
99	0	0	9	1	53	8	1	11	1	1	700	0	2809	1.21404
100	0	0	9	1	30	20	0	6	1	1	300	0	900	1.21404
101	1	0	8	1	30	4	1	0	0	1	100	0	900	2.0234
102	1	0	8	1	34	15	0	0	0	0	0	0	1156	2.22574
103	1	0	6	1	42	14	0	6	1	0	0	0	1764	2.63042
104	1	0	7	1	47	7	0	12	1	0	0	0	2209	6.0702
105	1	0	8	1	35	11	0	0	0	1	100	0	1225	2.42808
106	1	0	8	1	30	5	0	9	1	0	0	0	900	3.23744
107	1	0	6	0	50	19	1	0	0	0	0	1	2500	7.0819
108	1	0	6	1	45	13	1	0	0	1	472	0	2025	5.86786
109	1	0	12	1	32	5	1	9	1	1	480	0	1024	2.0234
110	1	0	16	1	50	20	0	0	0	1	100	0	2500	9.30764
111	1	0	16	1	60	15	1	0	0	0	0	0	3600	3.64212
112	1	0	16	1	28	20	0	0	0	0	0	0	784	2.0234
113	1	0	18	1	25	3	1	15	1	1	472	0	625	3.23744
114	1	0	18	0	35	5	1	0	0	1	472	0	1225	1.61872
115	1	0	18	1	23	3	0	13	1	0	0	0	529	1.21404
116	1	0	18	1	36	7	1	20	1	1	472	0	1296	1.61872
117	1	0	18	1	28	6	1	0	0	0	0	0	784	1.82106
118	1	0	18	1	32	20	1	9	1	1	472	0	1024	1.21404
119	1	0	16	1	25	4	1	15	1	0	0	0	625	1.21404
120	1	0	16	1	25	13	0	0	0	0	0	0	625	2.63042
121	1	0	18	1	45	12	1	0	0	0	0	0	2025	1.21404
122	1	0	18	1	60	11	1	0	0	1	100	0	3600	2.83276
123	1	0	16	1	50	10	0	0	0	0	0	0	2500	2.42808
124	1	0	2	1	29	7	0	0	0	0	0	0	841	2.42808
125	1	0	2	1	25	5	0	0	0	0	0	1	625	1.61872
126	1	0	2	1	45	15	0	0	0	0	0	1	2025	2.42808
127	1	0	2	1	65	30	0	0	0	0	0	0	4225	3.23744
128	1	0	2	1	35	15	0	0	0	0	0	0	1225	3.43978
129	1	0	2	1	35	5	0	0	0	0	0	1	1225	2.83276
130	1	0	2	1	42	14	0	0	0	1	472	0	1764	18.2106
131	1	0	2	1	30	15	1	0	0	0	0	0	900	2.63042
132	1	0	2	0	45	12	1	0	0	0	0	0	2025	0.80936
133	1	0	2	1	35	21	0	0	0	1	100	0	1225	1.82106
134	1	0	2	1	50	9	0	0	0	0	0	0	2500	3.23744
135	1	0	4	1	38	23	0	15	1	1	80	0	1444	1.0117
136	1	0	2	1	39	19	0	0	0	0	0	1	1521	2.42808
137	1	0	2	1	45	9	0	0	0	0	0	0	2025	1.61872
138	1	0	3	1	35	4	0	0	0	0	0	0	1225	1.21404
139	1	0	8	1	35	7	0	12	1	1	1000	0	1225	2.22574
140	1	0	6	1	24	10	0	5	1	0	0	1	576	1.82106
141	1	0	8	1	50	13	0	6	1	0	0	1	2500	2.63042
142	1	0	8	0	35	10	1	0	0	1	472	0	1225	1.21404
143	1	0	8	1	65	9	0	0	0	0	0	0	4225	2.83276
144	1	0	6	1	20	3	0	7	1	0	0	0	400	1.61872
145	1	0	4	1	40	10	1	8	1	0	0	0	1600	2.0234
146	1	0	4	1	50	18	0	15	1	1	2000	0	2500	3.84446
147	1	0	4	1	35	19	0	0	0	1	472	0	1225	7.0819
148	1	0	4	1	25	7	0	0	0	0	0	1	625	2.42808
149	1	0	4	1	39	7	0	7	1	1	472	0	1521	1.61872
150	1	0	4	1	43	10	0	0	0	1	472	0	1849	1.61872
151	0	1	6	1	75	15	1	2	1	0	0	1	5625	11.1287
152	0	1	6	0	53	9	1	3	1	1	1200	0	2809	1.61872
153	0	1	6	1	30	8	1	0	0	1	1200	0	900	1.21404
154	0	1	6	0	27	4	1	9	1	1	1200	0	729	1.82106
155	0	1	6	0	60	8	1	2	1	1	1200	1	3600	2.0234
156	0	1	6	1	30	7	1	3	1	1	500	0	900	1.21404
157	0	1	6	1	72	22	0	0	0	0	0	1	5184	1.41638
158	0	1	6	0	50	8	1	0	0	1	1200	1	2500	2.0234
159	0	1	6	0	60	3	1	0	0	0	0	1	3600	2.0234
160	0	1	6	0	35	13	1	0	0	1	200	0	1225	0.60702
161	0	1	6	1	35	10	1	0	0	0	0	0	1225	1.0117
162	0	1	6	1	39	9	1	8	1	0	0	1	1521	0.890296
163	0	1	6	1	50	8	1	0	0	1	100	0	2500	0.526084
164	0	1	6	1	45	11	1	0	0	1	300	0	2025	1.49732
165	0	1	6	0	20	4	1	0	0	1	500	0	400	0.60702
166	0	1	6	0	27	3	1	2	1	1	1200	0	729	1.0117
167	0	1	6	1	29	10	1	0	0	1	1000	0	841	1.51755
168	0	1	4	0	36	13	0	4	1	1	600	1	1296	0.80936
169	0	1	4	1	33	3	0	17	1	1	4800	0	1089	2.42808
170	0	1	4	1	39	9	0	0	0	0	0	1	1521	2.9137
171	0	1	4	1	32	8	1	8	1	0	0	0	1024	3.43978
172	0	1	4	1	26	3	1	0	0	0	0	0	676	2.22574
173	0	1	4	1	32	5	1	0	0	0	0	1	1024	3.23744
174	0	1	4	0	25	8	0	12	1	0	0	1	625	3.23744
175	0	1	4	1	59	9	1	10	1	0	0	1	3481	1.69966
176	0	1	10	0	25	5	1	12	1	1	600	0	625	1.0117
177	0	1	4	1	35	13	1	13	1	0	0	1	1225	2.22574
178	0	1	10	1	45	7	1	6	1	1	1800	1	2025	1.51755
179	0	1	10	0	35	7	0	0	0	1	1200	0	1225	0.354095
180	0	1	4	1	40	5	1	17	1	1	4000	0	1600	2.10434
181	0	1	5	1	60	16	0	0	0	0	0	1	3600	2.22574
182	0	1	10	1	28	4	1	17	1	1	850	1	784	0.60702
183	0	1	4	1	57	16	1	6	1	0	0	1	3249	2.42808
184	0	1	4	1	48	6	1	9	1	1	600	1	2304	6.71769
185	0	1	10	0	50	4	1	0	0	1	600	1	2500	0.60702
186	0	1	10	1	27	13	0	17	1	1	1800	0	729	2.0234
187	0	1	4	1	28	6	1	0	0	1	1200	1	784	1.82106
188	0	1	10	0	70	7	1	0	0	1	480	1	4900	2.42808
189	0	1	10	1	26	7	0	17	1	0	0	1	676	2.83276
190	0	1	10	0	45	7	1	0	0	0	0	1	2025	0.80936
191	0	1	10	1	35	7	1	6	1	0	0	1	1225	1.71989
192	0	1	4	1	29	12	0	5	1	1	1320	1	841	0.80936
193	0	1	4	1	30	7	1	13	1	0	0	0	900	3.23744
194	0	1	4	1	22	15	1	8	1	1	600	1	484	4.28961
195	0	1	4	1	45	11	1	0	0	0	0	0	2025	1.41638
196	0	1	4	0	35	6	0	0	0	0	0	0	1225	1.61872
197	0	1	4	0	45	7	1	0	0	0	0	0	2025	3.64212
198	0	1	10	0	60	5	1	0	0	0	0	0	3600	1.21404
199	0	1	4	1	55	6	1	0	0	1	600	1	3025	2.63042
200	0	1	4	1	58	12	1	10	1	1	600	0	3364	2.83276
201	0	1	13	1	38	9	1	0	0	1	1200	1	1444	3.23744
202	0	1	13	0	39	6	1	0	0	1	1200	0	1521	0.80936
203	0	1	13	0	46	3	1	0	0	1	1200	0	2116	0.60702
204	0	1	13	0	35	6	1	0	0	1	1400	0	1225	0.80936
205	0	1	13	0	28	5	0	6	1	1	2400	0	784	0.40468
206	0	1	13	1	72	4	1	0	0	0	0	0	5184	1.61872
207	0	1	13	1	29	5	1	9	1	0	0	0	841	0.40468
208	0	1	13	1	32	7	1	0	0	0	0	0	1024	2.22574
209	0	1	13	0	46	7	1	1	1	0	0	0	2116	0.40468
210	0	1	13	1	37	10	1	3	1	0	0	1	1369	1.41638
211	0	1	12	1	29	5	1	13	1	1	1200	0	841	0.40468
212	0	1	12	1	37	7	1	6	1	0	0	0	1369	1.21404
213	0	1	12	1	42	6	1	6	1	1	1200	0	1764	1.61872
214	0	1	12	1	35	4	1	0	0	1	1400	1	1225	1.41638
215	0	1	12	1	36	5	1	0	0	0	0	1	1296	0.60702
216	0	1	12	1	30	5	1	13	1	1	1200	1	900	1.0117
217	0	1	12	1	29	4	0	0	0	0	0	1	841	2.83276
218	0	1	12	1	29	6	1	0	0	0	0	0	841	0.80936
219	0	1	12	1	63	5	1	0	0	0	0	0	3969	0.60702
220	0	1	12	1	35	2	1	0	0	0	0	0	1225	0.80936
221	0	1	6	1	44	6	1	0	0	1	345	1	1936	0.80936
222	0	1	6	1	56	11	1	5	1	1	150	1	3136	2.63042
223	0	1	6	1	31	5	1	0	0	1	310	0	961	0.80936
224	0	1	6	1	38	8	0	0	0	0	0	1	1444	1.21404
225	0	1	6	1	48	5	1	0	0	1	700	0	2304	1.61872
226	0	1	6	1	51	7	1	10	1	1	250	1	2601	1.21404
227	0	1	5	0	42	6	1	0	0	1	600	0	1764	1.21404
228	0	1	5	0	49	5	1	10	1	1	500	0	2401	0.40468
229	0	1	6	1	44	10	0	0	0	1	600	1	1936	0.80936
230	0	1	6	1	53	6	1	10	1	1	150	0	2809	1.51755
231	0	1	5	1	37	4	1	0	0	0	0	0	1369	0.80936
232	0	1	5	1	45	7	1	0	0	0	0	0	2025	0.40468
233	0	1	5	1	50	6	1	3	1	0	0	0	2500	1.0117
234	0	1	5	1	39	7	1	0	0	0	0	1	1521	2.0234
235	0	1	5	1	53	10	1	1	1	0	0	1	2809	0.80936
236	0	1	5	1	30	9	1	0	0	0	0	1	900	1.0117
237	0	1	5	1	48	10	1	0	0	0	0	1	2304	0.40468
238	0	1	5	1	62	15	1	0	0	0	0	1	3844	1.21404
239	0	1	5	1	28	5	1	0	0	0	0	1	784	0.30351
240	0	1	5	1	47	8	1	0	0	0	0	1	2209	0.80936
241	0	1	5	1	65	6	1	17	1	0	0	0	4225	0.40468
242	0	1	5	1	30	4	1	12	1	0	0	1	900	0.40468
243	0	1	5	1	47	7	1	10	1	1	1200	0	2209	0.30351
244	0	1	5	0	45	6	1	0	0	0	0	0	2025	0.40468
245	0	1	5	1	55	8	1	0	0	0	0	1	3025	0.60702
246	0	1	5	1	53	10	1	3	1	0	0	1	2809	0.60702
247	0	1	5	1	47	6	1	0	0	0	0	0	2209	0.40468
248	0	1	5	0	40	5	1	10	1	0	0	0	1600	0.80936
249	0	1	5	1	46	6	1	0	0	0	0	1	2116	1.21404
250	0	1	2	1	36	4	1	6	1	0	0	0	1296	0.40468
251	1	1	8	1	35	5	1	8	1	1	800	0	1225	4.45148
252	1	1	8	1	65	16	1	0	0	0	0	1	4225	4.65382
253	1	1	8	1	30	14	0	0	0	0	0	1	900	3.23744
254	1	1	8	1	40	14	1	8	1	0	0	0	1600	3.23744
255	1	1	8	1	30	7	0	3	1	1	900	0	900	1.82106
256	1	1	3	1	35	5	0	15	1	1	100	0	1225	2.22574
257	1	1	8	1	70	9	0	0	0	0	0	0	4900	2.0234
258	1	1	4	1	58	11	0	0	0	0	0	0	3364	1.61872
259	1	1	2	1	50	27	1	0	0	0	0	1	2500	3.23744
260	1	1	5	1	50	20	0	0	0	0	0	0	2500	2.63042
261	1	1	4	1	34	11	0	0	0	0	0	1	1156	4.0468
262	1	1	5	1	32	19	0	0	0	0	0	0	1024	3.0351
263	1	1	5	1	25	15	0	15	1	0	0	0	625	0.80936
264	1	1	5	1	40	22	0	0	0	1	800	0	1600	8.0936
265	1	1	3	1	54	40	1	0	0	0	0	1	2916	5.66552
266	1	1	4	1	30	13	0	7	1	0	0	0	900	3.0351
267	1	1	4	1	57	6	0	7	1	0	0	0	3249	2.42808
268	1	1	2	1	39	11	1	0	0	1	500	0	1521	4.24914
269	1	1	4	1	39	15	1	0	0	0	0	0	1521	1.61872
270	1	1	4	1	30	21	0	0	0	0	0	0	900	3.23744
271	1	1	4	1	42	10	1	0	0	0	0	0	1764	3.23744
272	1	1	4	1	47	12	0	0	0	0	0	0	2209	4.0468
273	1	1	4	1	38	6	1	0	0	0	0	1	1444	1.0117
274	1	1	7	1	52	11	0	0	0	1	2000	0	2704	3.23744
275	1	1	4	1	35	23	0	6	1	0	0	0	1225	3.23744
276	1	1	3	1	45	25	1	0	0	0	0	0	2025	4.0468
277	1	1	4	1	39	10	0	0	0	0	0	0	1521	4.24914
278	1	1	8	1	40	11	1	2	1	1	130	0	1600	3.43978
279	1	1	4	1	45	15	1	0	0	0	0	0	2025	3.64212
280	1	1	4	1	55	17	0	0	0	0	0	0	3025	6.0702
281	1	1	6	1	55	12	1	1	1	0	0	0	3025	4.65382
282	1	1	8	1	38	7	1	0	0	0	0	0	1444	3.23744
283	1	1	5	1	30	71	1	15	1	0	0	1	900	6.47488
284	1	1	5	1	45	15	1	14	1	0	0	0	2025	4.0468
285	1	1	8	1	45	19	1	0	0	0	0	1	2025	3.64212
286	1	1	9	1	29	6	0	2	1	0	0	0	841	2.63042
287	1	1	7	1	27	16	1	9	1	1	400	0	729	3.0351
288	1	1	8	1	55	42	0	0	0	0	0	0	3025	5.66552
289	1	1	8	1	70	11	1	0	0	1	400	1	4900	4.85616
290	1	1	10	1	65	11	1	0	0	0	0	1	4225	3.64212
291	1	1	7	1	30	16	1	6	1	0	0	1	900	3.64212
292	1	1	6	1	57	26	1	0	0	0	0	0	3249	12.1404
293	1	1	6	1	45	20	1	0	0	0	0	0	2025	6.87956
294	1	1	6	1	40	12	1	6	1	0	0	0	1600	7.89126
295	1	1	6	1	35	4	1	9	1	1	2000	0	1225	3.0351
296	1	1	4	1	35	7	0	0	0	0	0	0	1225	2.42808
297	1	1	18	1	31	4	0	12	1	1	1000	0	961	2.83276
298	1	1	9	1	70	30	0	0	0	0	0	1	4900	12.5451
299	1	1	9	1	35	53	0	0	0	0	0	0	1225	4.0468
300	1	1	9	1	30	15	0	0	0	0	0	0	900	1.0117
